# Supplementary material for: Prevalence and access to care for cardiovascular risk factors in older people in Sierra Leone: a cross-sectional survey
Source: PubMed Central journal article supplement (PMC7482482; doi:10.1136/bmjopen-2020-038520), 2020-09-09
Supplement: bmjopen-2020-038520supp001.pdf [file bmjopen-2020-038520supp001.pdf]

**Appendix table 1** Sensitivity analysis with BMI >30 of multivariable associations between demographic characteristics and cardiovascular risk (n=2071)

| parameter       | group                 | Hypertension     |         | Diabetes         |         | Dyslipidaemia    |         | Obesity (BMI>30) |         | Smoking           |         | Total CVD risk factors incl. chol |         | Total CVD risk factors excl. chol |         |
|-----------------|-----------------------|------------------|---------|------------------|---------|------------------|---------|------------------|---------|-------------------|---------|-----------------------------------|---------|-----------------------------------|---------|
|                 |                       | OR (95% CI)      | P-value | OR (95% CI)      | P-value | OR (95% CI)      | P-value | OR (95% CI)      | P-value | OR (95% CI)       | P-value | OR (95% CI)                       | P-value | OR (95% CI)                       | P-value |
| Place of living | Rural                 | Referent         | -       | Referent         | -       | Referent         | -       | Referent         | -       | Referent          | -       | Referent                          | -       | Referent                          | -       |
|                 | Urban                 | 1.04 (1.01-1.08) | 0.014   | 1.46 (1.34-1.60) | <0.001  | 0.84 (0.75-0.93) | 0.001   | 1.4 (1.33-1.48)  | <0.001  | 1.13 (1.08-1.17)  | <0.001  | 0.99 (0.93-1.05)                  | 0.614   | 1.06 (1.02-1.10)                  | 0.002   |
| Gender          | Female                | Referent         | -       | Referent         | -       | Referent         | -       | Referent         | -       | Referent          | -       | Referent                          | -       | Referent                          | -       |
|                 | Male                  | 0.78 (0.75-0.80) | <0.001  | 0.75 (0.69-0.82) | <0.001  | 0.88 (0.80-0.97) | 0.013   | 0.24 (0.23-0.26) | <0.001  | 9.15 (8.76-9.54)  | <0.001  | 1.6 (1.52-1.70)                   | <0.001  | 1.43 (1.38-1.48)                  | <0.001  |
| Age             | 40-49                 | Referent         | -       | Referent         | -       | Referent         | -       | Referent         | -       | Referent          | -       | Referent                          | -       | Referent                          | -       |
|                 | 50-59                 | 1.75 (1.69-1.81) | <0.001  | 2.10 (1.91-2.32) | <0.001  | 1.38 (1.25-1.53) | <0.001  | 0.74 (0.70-0.79) | <0.001  | 0.84 (0.81-0.880) | <0.001  | 0.93 (0.88-0.99)                  | 0.023   | 1.15 (1.11-1.20)                  | <0.001  |
|                 | 60-69                 | 2.35 (2.26-2.45) | <0.001  | 2.77 (2.50-3.07) | <0.001  | 1.36 (1.22-1.53) | <0.001  | 0.85 (0.80-0.91) | <0.001  | 0.58 (0.56-0.61)  | <0.001  | 1.25 (1.16-1.35)                  | <0.001  | 1.70 (1.60-1.81)                  | <0.001  |
|                 | 70-79                 | 3.43 (3.27-3.61) | <0.001  | 3.46 (3.07-3.89) | <0.001  | 1.76 (1.52-2.05) | <0.001  | 0.64 (0.59-0.70) | <0.001  | 0.36 (0.33-0.38)  | <0.001  | 2.24 (2.00-2.51)                  | <0.001  | 1.25 (1.16-1.34)                  | <0.001  |
|                 | >80                   | 3.13 (2.96-3.32) | <0.001  | 1.76 (1.69-1.99) | <0.001  | 0.98 (0.81-1.19) | 0.835   | 0.59 (0.53-0.66) | <0.001  | 0.52 (0.48-0.56)  | <0.001  | 1.22 (1.09-1.38)                  | 0.001   | 1.07 (1.16-1.34)                  | <0.001  |
| Education level | No complete education | Referent         | -       | Referent         | -       | Referent         | -       | Referent         | -       | Referent          | -       | Referent                          | -       | Referent                          | -       |
|                 | Any education         | 1.17 (1.14-1.21) | <0.001  | 1.83 (1.69-1.99) | <0.001  | 1.08 (0.98-1.18) | 0.111   | 1.26 (1.20-1.33) | <0.001  | 0.86 (0.83-0.89)  | <0.001  | 0.91 (0.86-0.96)                  | 0.001   | 1.07 (1.04-1.11)                  | <0.001  |
| Marital status  | Single/divorced/widow | Referent         | -       | Referent         | -       | Referent         | -       | Referent         | -       | Referent          | -       | Referent                          | -       | Referent                          | -       |
|                 | Married/Cohabiting    | 0.8 (0.78-0.83)  | <0.001  | 1.01 (0.93-1.11) | 0.785   | 0.62 (0.56-0.68) | <0.001  | 1.26 (1.20-1.33) | <0.001  | 0.8 (0.77-0.84)   | <0.001  | 0.81 (0.76-0.86)                  | <0.001  | 0.84 (0.81-0.88)                  | <0.001  |

|                 |   |                     |        |                     |        |                       |        |                     |        |                     |        |                     |        |                     |        |
|-----------------|---|---------------------|--------|---------------------|--------|-----------------------|--------|---------------------|--------|---------------------|--------|---------------------|--------|---------------------|--------|
| Wealth quintile | 1 | Referent            | -      | Referent            | -      | Referent              | -      | Referent            | -      | Referent            | -      | Referent            | -      | Referent            | -      |
|                 | 2 | 0.83<br>(0.79-0.86) | <0.001 | 1.31<br>(1.14-1.52) | <0.001 | 1.84<br>(1.47-2.29)   | <0.001 | 2<br>(1.83-2.20)    | <0.001 | 0.96<br>(0.92-1.01) | 0.105  | 1.06<br>(0.98-1.14) | 0.142  | 1.1<br>(1.05-1.15)  | <0.001 |
|                 | 3 | 0.99<br>(0.95-1.03) | 0.698  | 1.2<br>(1.04-1.39)  | 0.014  | 2.36<br>(1.90-2.29)   | <0.001 | 2.08<br>(1.90-2.78) | <0.001 | 0.71<br>(0.68-0.75) | <0.001 | 0.87<br>(0.81-0.94) | 0.001  | 0.91<br>(0.87-0.95) | 0.001  |
|                 | 4 | 1.3<br>(1.25-1.36)  | <0.001 | 1.64<br>(1.42-1.88) | <0.001 | 6.19<br>(5.07-7.56)   | <0.001 | 3.26<br>(2.98-3.55) | <0.001 | 0.51<br>(0.49-0.54) | <0.001 | 1.41<br>(1.30-1.53) | <0.001 | 1.32<br>(1.25-1.38) | <0.001 |
|                 | 5 | 1.6<br>(1.52-1.69)  | <0.001 | 2.7<br>(2.34-3.12)  | <0.001 | 11.16<br>(9.05-13.76) | <0.001 | 4.5<br>(4.12-4.93)  | <0.001 | 0.39<br>(0.37-0.42) | <0.001 | 2.46<br>(2.23-2.73) | <0.001 | 1.62<br>(1.53-1.72) | <0.001 |

**Appendix table 2** Demographic characteristics of participants with and without measured cholesterol (n = 2071)

| parameter        | group                   | Not measured cholesterol | Measured Cholesterol |
|------------------|-------------------------|--------------------------|----------------------|
| Place of living  | Rural                   | 61.30%                   | 61.50%               |
|                  | Urban                   | 38.70%                   | 38.50%               |
| Gender           | Male                    | 47.30%                   | 40.60%               |
|                  | Female                  | 52.70%                   | 59.4%*               |
| Age median (IQR) |                         | 56 (46-67)               | 55 (47-68)           |
| Education level  | No completed education  | 70.10%                   | 67.50%               |
|                  | Any education           | 29.90%                   | 32.30%               |
| Marital status   | Married/Cohabiting      | 69.20%                   | 67.90%               |
|                  | Single/widowed/divorced | 30.80%                   | 32.10%               |
| Wealth quintile  | 1                       | 21.10%                   | 18.20%               |
|                  | 2                       | 20.10%                   | 19.80%               |
|                  | 3                       | 20.80%                   | 19.00%               |
|                  | 4                       | 17.90%                   | 23.10%               |
|                  | 5                       | 20.10%                   | 19.80%               |

\*p&lt;0.005

**Appendix table 3** Univariable associations between demographic characteristics and cardiovascular risk factors (n=2071)

| parameter       | group                       | Hypertension | Diabetes | Hypercholesterolaemia | Obesity | Smoking | One CVD risk factor or incl. Cholesterol | One CVD risk factors or more exc. Cholesterol |
|-----------------|-----------------------------|--------------|----------|-----------------------|---------|---------|------------------------------------------|-----------------------------------------------|
| Place of living | Rural                       | 46.00%       | 2.30%    | 5.00%                 | 20.40%  | 28.40%  | 75.50%                                   | 72.60%                                        |
|                 | Urban                       | 55.8%*       | 5.5%*    | 9.6%*                 | 37.2%*  | 21.0%*  | 79.6%*                                   | 77.8%*                                        |
| Gender          | Female                      | 54.80%       | 4.00%    | 7.90%                 | 36.70%  | 8.40%   | 74.80%                                   | 72.30%                                        |
|                 | Male                        | 44.7%*       | 3.0%*    | 5.3%*                 | 17.0%*  | 42.2%*  | 79.5%*                                   | 76.7%*                                        |
| Age             |                             | 0.239*       | 0.081*   | 0.080*                | -0.039* | -0.114* | 0.068*                                   | 0.073*                                        |
| Age groups      | 40-49                       | 37.50%       | 1.80%    | 4.90%                 | 28.00%  | 30.60%  | 75.00%                                   | 71.60%                                        |
|                 | 50-59                       | 52.20%       | 4.20%    | 7.30%                 | 27.20%  | 27.60%  | 75.40%                                   | 75.70%                                        |
|                 | 60-69                       | 60.50%       | 5.70%    | 9.80%                 | 28.20%  | 19.10%  | 80.60%                                   | 76.30%                                        |
|                 | 70-79                       | 68.00%       | 5.70%    | 9.90%                 | 21.70%  | 14.70%  | 84.40%                                   | 80.40%                                        |
|                 | >80                         | 68.0%**      | 3.4%**   | 5.8%**                | 16.0%** | 17.6%** | 80.6%**                                  | 77.2%**                                       |
| Education level | No completed education      | 48.50%       | 2.60%    | 5.60%                 | 22.80%  | 24.60%  | 76.00%                                   | 72.90%                                        |
|                 | Any education               | 52.0%*       | 5.4%*    | 8.9%*                 | 34.3%*  | 27.8%*  | 79.1%*                                   | 77.7%*                                        |
| Marital status  | Married/Cohabiting          | 45.50%       | 3.20%    | 5.70%                 | 25.50%  | 29.20%  | 76.30%                                   | 73.70%                                        |
|                 | Single/divorced/<br>Widowed | 60.6%*       | 4.3%*    | 9.4%*                 | 29.4%*  | 16.1%*  | 79.1%*                                   | 76.7%*                                        |
| Wealth quintile | 1                           | 45.80%       | 1.70%    | 1.60%                 | 13.80%  | 32.00%  | 73.40%                                   | 71.10%                                        |
|                 | 2                           | 41.80%       | 2.30%    | 3.10%                 | 17.50%  | 32.10%  | 75.70%                                   | 73.40%                                        |
|                 | 3                           | 46.90%       | 2.40%    | 3.80%                 | 21.50%  | 26.60%  | 71.50%                                   | 70.20%                                        |
|                 | 4                           | 54.00%       | 3.70%    | 9.50%                 | 34.60%  | 20.40%  | 79.10%                                   | 77.50%                                        |
|                 | 5                           | 62.4%**      | 7.7%**   | 15.0%**               | 50.6%** | 16.0%** | 86.3%**                                  | 82.2%**                                       |

\*P&lt;0.001, \*\*P for trend&lt;0.001
